# Supplementary material
Source: PubMed Central journal article supplement (PMC3281530)
Supplement: supp_en.2011-1837_EN-11-1837suptabfig.pdf [file supp_en.2011-1837_EN-11-1837suptabfig.pdf]

## Supplemental Tables

**SUPPLEMENTAL TABLE 1.** Oligonucleotides used for site-directed mutagenesis of cDNAs encoding the human or spotted hyena SHBG precursor polypeptides.

| Amino acid substitutions        | Mutagenic oligonucleotides <sup>a</sup>                    |
|---------------------------------|------------------------------------------------------------|
| Human SHBG                      |                                                            |
| F56L                            | 5'-TATCCCCATA <u>C</u> AAAATCACTCCCTC                      |
| W84V                            | 5'-GTAAGCTGGGCC <u>A</u> CGTGATTGTGCAG                     |
| M139V                           | 5'-AAGCGCAATCCTCA <u>C</u> GATGGGATGGCG                    |
| (T183 + G)                      | 5'-CTTCTGAGGCT <u>GCC</u> AGTGGGGGC                        |
| Spotted hyena SHBG <sup>b</sup> |                                                            |
| W15 + L                         | 5'-CCACGGCGGCGGTGGTTG <u>CTG</u> CTGCTTGTGCTGCTG           |
| W15 + 2L                        | 5'-GGCGGTGGTTGCTGCTGCTT <u>CTT</u> CTGCTGCTGCTGCTACCTCACAG |
| W15L + 2L                       | 5'-ACATCGCCACGGCGGCGGT <u>T</u> GTTGCTGCTGCTTCTTCTGC       |

<sup>a</sup> The nucleotides added or modified are indicated in bold face type and underlined.

<sup>b</sup> The consensus spotted hyena SHBG cDNA sequence was produced by adding an extra Leu codon (TTG) at position 16 in the secretion signal polypeptide sequence within the original cDNA clone (Accession # DQ285473).

**SUPPLEMENTAL FIG. 1.** Primary structure comparison of spotted hyena (spSHBG) and human (hSHBG) SHBG precursor polypeptides. Amino acid residues within the mature human SHBG sequence that were targeted for substitution or addition of residues in the corresponding positions of spotted hyena SHBG are shown in bold. The cysteine residues that form intramolecular disulfide bridges within the two LG domains are in bold underlined. Consensus sites for N-glycosylation are also underlined. Sequence alignment was obtained using the Clustal method. Gaps were introduced to maximize sequence similarities. Identical residues are indicated by asterisk, while conserved residues are indicated by double dots, and semi-conserved residues are indicated by single dots.

```

spSHBG MEGRGPLATSPRRRWLLLLLLLLPHS-----HQRIQDPPAVHLSSASGQGP 45
hSHBG MESRGPLATS-RLLLLLLLLLLRHTRQGWALRPVLPTQSAHDPPAVHLSNGPGQEP 55
** .***** *      ***** *:          * :***** . . .** *

spSHBG VTIMTFDFTKMRKTSSSFELRTWDPEGVILYGDTPHEDWFMLGLRGRPEIQIHN 101
hSHBG IAVMTFDLTKITKTSSSFVRTWDPEGVIFYGDTNPKDDWFMLGLRDGRPEIQLHN 111
.: :*****:**: *****:*****:*****:*. :*****.*****:**

spSHBG HVARLTVGAGPRLDDGKWHQVEVKVLGDLLLLTVDGEEVLCLKQVFGPLASRPQPV 157
hSHBG HWAQLTVGAGPRLDDGRWHQVEVKMEGDSVLLLEVDGEEVLRRLRQVSGPLTSKRHPI 167
* * :*****:*****: ** :** ***** *:* ** *:* : *:*

spSHBG VRIAVGGLPFPSSLRLPLVPALDGCVRRGSWLDHQAQTSVSALSGSPRSCGVESQ 213
hSHBG MRIALGGLLFPASNLRLPLVPALDGCLRRDSWLDKQAEISASAPT-SLRSCDVESN 222
:***:** * . * .*****:*. *****:**: * .** : * ** .***:

spSHBG PGSFFPPGAHAEFSLQDLQPHAEPWAFSLDLGLQLAAGSGHLLALGTPENPPRLS 269
hSHBG PGIFLPPGTQAEFNLRDIPQHAEPWAFSLDLGLKQAAGSGHLLALGTPENPSWLS 278
** * :***: :*** . * :*****: ***** . **

spSHBG LQLQDQKVVLSAWGPQLHLPLVLGAPLQKLAASGVTLSQGPETEILALPLSDPG 325
hSHBG LHLQDQKVVLSGSGPGLDLPLVLGLPLQKLSMSRVVLSQGSKMKALALPPLGLL 334
* :***** . ** * .***** *****: * * .***. : : **** .

spSHBG SLLNLWVQPHARLFLGALPGEAASASFCLDGLWAQGQKLDMDRALNRSQNIWTHSC 381
hSHBG PSLNLWAKPQGRFLFLGALPGEDSSTSFCLNGLWAQGQRLDVDQALNRSHEIWTHSC 390
. **** . :* :***** :* :*****:*****:***:* :*****: :*****

spSHBG PQSLGNDTDTTH 393
hSHBG PQSPGNGTDASH 402
*** ** .** : *

```

Amino-terminal LG-domain

Carboxy-terminal LG-domain

## Supplemental Figure 1
